# Supplementary material for: The trianionic hydrazido radical (N2)3−: a promising platform for transforming N2
Source: Royal Society of Chemistry journal article supplement (doi:10.1039/d2qi02543d), 2023-01-01
Supplement: d2qi02543d1.pdf [file d2qi02543d1.pdf]

**Supporting Information for:**

The trianionic hydrazido radical  $(\text{N}_2)^{3-}$ : a promising platform for transforming  $\text{N}_2$ .

Josué Rolando Aguilar-Calderón, Junnian Wei,\* Zhenfeng Xi\*

Beijing National Laboratory for Molecular Sciences (BNLMS), Key Laboratory of  
Bioorganic Chemistry and Molecular Engineering of Ministry of Education, College of  
Chemistry, Peking University, Beijing 100871, China.

## Contents

|                                                    |    |
|----------------------------------------------------|----|
| DFT Calculations .....                             | 3  |
| The Optimized Structures.....                      | 4  |
| <b>1</b> .....                                     | 4  |
| <b>1A</b> .....                                    | 10 |
| Fuzzy atom bond order of complex <b>1</b> .....    | 16 |
| Fuzzy atom bond order of complex <b>1A</b> . ..... | 22 |
| References.....                                    | 28 |

## DFT Calculations

Geometric structure optimizations were performed with TPSSh/def2-SVP level of theory by ORCA 5.0.3.<sup>1,2</sup> The wavefunctions were generated at the wb97M-V/def2-TZVP level of theory based on the optimized structures. The wave function analysis (FBO<sup>3</sup> and LOL<sup>4</sup>) was performed by the Multiwfn software.<sup>5</sup> We only took the anion component of **1** to simplify the calculation. The  $S = 1/2$  ground state was chosen for complex **1** and **1A**. To pair the  $\alpha$  and  $\beta$  orbitals generated by the open shell calculations, biorthogonalization was performed based on the canonical orbitals by the Multiwfn software to obtain the SOMO of **1** and **1A**.

## The Optimized Structures

**1**

-----  
CARTESIAN COORDINATES (ANGSTROEM)  
-----

|    |           |           |          |
|----|-----------|-----------|----------|
| Sc | 2.829524  | 2.995092  | 3.230169 |
| N  | 3.009669  | 3.054236  | 5.367463 |
| N  | 2.305377  | 0.895559  | 2.909741 |
| N  | 0.866886  | 2.536596  | 2.360273 |
| C  | 1.065809  | 1.223601  | 2.523687 |
| C  | -0.033897 | 0.191592  | 2.353371 |
| H  | 0.413851  | -0.738737 | 1.978037 |
| H  | -0.741753 | 0.532674  | 1.584246 |
| C  | -0.798691 | -0.084184 | 3.659821 |
| H  | -0.082071 | -0.359392 | 4.450977 |
| H  | -1.274874 | 0.849813  | 3.995627 |
| C  | -1.862244 | -1.180732 | 3.527632 |
| H  | -2.452979 | -1.204855 | 4.459286 |
| H  | -2.569314 | -0.906470 | 2.724135 |
| C  | -1.293259 | -2.575689 | 3.260274 |
| H  | -0.751721 | -2.622526 | 2.301775 |
| H  | -2.093602 | -3.330989 | 3.221908 |
| H  | -0.588842 | -2.872041 | 4.055302 |
| C  | -0.429445 | 3.106252  | 2.022588 |
| H  | -1.239642 | 2.509524  | 2.484754 |

|   |           |           |          |
|---|-----------|-----------|----------|
| C | -0.660196 | 3.119788  | 0.503633 |
| H | 0.104072  | 3.739892  | 0.010959 |
| H | -1.651740 | 3.534957  | 0.260082 |
| H | -0.596804 | 2.107150  | 0.075989 |
| C | -0.516349 | 4.522209  | 2.598112 |
| H | -0.348439 | 4.512917  | 3.683071 |
| H | -1.501167 | 4.970511  | 2.392649 |
| H | 0.255056  | 5.161786  | 2.144503 |
| C | 2.721467  | -0.474422 | 3.168376 |
| H | 1.878636  | -1.059216 | 3.584421 |
| C | 3.183472  | -1.169331 | 1.878201 |
| H | 2.385827  | -1.173563 | 1.119269 |
| H | 3.478812  | -2.212897 | 2.074480 |
| H | 4.047492  | -0.638311 | 1.450061 |
| C | 3.835346  | -0.465901 | 4.218262 |
| H | 4.707582  | 0.087399  | 3.839983 |
| H | 4.155364  | -1.491173 | 4.461980 |
| H | 3.497254  | 0.029205  | 5.138630 |
| C | 5.079537  | 4.019657  | 3.179685 |
| C | 4.151324  | 5.032412  | 2.791160 |
| C | 3.571710  | 4.643107  | 1.546719 |
| C | 4.129518  | 3.382333  | 1.173733 |
| C | 5.074481  | 3.006051  | 2.175394 |
| C | 5.954174  | 4.070674  | 4.397338 |
| H | 5.393082  | 4.396884  | 5.286080 |
| H | 6.792710  | 4.776406  | 4.257827 |

|    |          |          |           |
|----|----------|----------|-----------|
| H  | 6.386990 | 3.086090 | 4.623718  |
| C  | 3.898807 | 6.305577 | 3.544688  |
| H  | 2.974137 | 6.795917 | 3.208489  |
| H  | 4.725741 | 7.024777 | 3.404955  |
| H  | 3.801174 | 6.122727 | 4.625882  |
| C  | 2.639181 | 5.462718 | 0.703216  |
| H  | 1.934370 | 4.831294 | 0.143588  |
| H  | 3.203956 | 6.056349 | -0.037781 |
| H  | 2.051630 | 6.171533 | 1.305096  |
| C  | 3.803453 | 2.616951 | -0.077424 |
| H  | 4.050900 | 1.551017 | 0.028775  |
| H  | 4.364759 | 3.003331 | -0.946998 |
| H  | 2.731781 | 2.683130 | -0.320445 |
| C  | 5.995142 | 1.821026 | 2.119750  |
| H  | 6.290802 | 1.482828 | 3.124038  |
| H  | 6.923073 | 2.074119 | 1.576513  |
| H  | 5.537822 | 0.967354 | 1.599372  |
| N  | 2.206319 | 3.952168 | 5.049331  |
| Sc | 2.387643 | 4.010713 | 7.186950  |
| N  | 2.923019 | 6.105437 | 7.515576  |
| N  | 4.354263 | 4.455057 | 8.056032  |
| C  | 4.161825 | 5.769557 | 7.897844  |
| C  | 5.266576 | 6.795831 | 8.070171  |
| H  | 4.824019 | 7.725488 | 8.453301  |
| H  | 5.976042 | 6.447091 | 8.834374  |
| C  | 6.027660 | 7.077443 | 6.762743  |

|   |          |           |           |
|---|----------|-----------|-----------|
| H | 5.309137 | 7.357274  | 5.974887  |
| H | 6.502131 | 6.144774  | 6.420940  |
| C | 7.092714 | 8.172269  | 6.897452  |
| H | 7.681637 | 8.199682  | 5.964746  |
| H | 7.801058 | 7.893767  | 7.698362  |
| C | 6.525946 | 9.566763  | 7.171838  |
| H | 5.986025 | 9.610183  | 8.131413  |
| H | 7.327337 | 10.320849 | 7.212188  |
| H | 5.820635 | 9.867486  | 6.379260  |
| C | 5.649443 | 3.877195  | 8.384487  |
| H | 6.460132 | 4.471632  | 7.920272  |
| C | 5.888740 | 3.856028  | 9.902027  |
| H | 5.124969 | 3.236704  | 10.396392 |
| H | 6.880040 | 3.435902  | 10.137983 |
| H | 5.831933 | 4.866924  | 10.334716 |
| C | 5.725479 | 2.463192  | 7.802607  |
| H | 5.551636 | 2.478082  | 6.718683  |
| H | 6.708842 | 2.008428  | 8.000771  |
| H | 4.952864 | 1.826022  | 8.257613  |
| C | 2.513070 | 7.478750  | 7.264820  |
| H | 3.358044 | 8.061486  | 6.850311  |
| C | 2.056797 | 8.169202  | 8.559372  |
| H | 2.855948 | 8.165846  | 9.316728  |
| H | 1.766004 | 9.215135  | 8.368975  |
| H | 1.191153 | 7.640048  | 8.986554  |
| C | 1.397436 | 7.481173  | 6.216765  |

|   |           |           |           |
|---|-----------|-----------|-----------|
| H | 0.522393  | 6.931655  | 6.594019  |
| H | 1.083226  | 8.509328  | 5.977693  |
| H | 1.731168  | 6.987808  | 5.293831  |
| C | 0.136424  | 2.989630  | 7.237616  |
| C | 1.062865  | 1.975845  | 7.627804  |
| C | 1.642584  | 2.365822  | 8.871912  |
| C | 1.086510  | 3.627815  | 9.243253  |
| C | 0.142585  | 4.004476  | 8.240775  |
| C | -0.737525 | 2.938538  | 6.019435  |
| H | -0.176099 | 2.611252  | 5.131284  |
| H | -1.576812 | 2.233684  | 6.158859  |
| H | -1.169267 | 3.923384  | 5.792078  |
| C | 1.313817  | 0.701349  | 6.876043  |
| H | 2.237467  | 0.209960  | 7.213502  |
| H | 0.485671  | -0.016358 | 7.016256  |
| H | 1.412369  | 0.882635  | 5.794676  |
| C | 2.573215  | 1.546291  | 9.717538  |
| H | 3.281962  | 2.177353  | 10.272566 |
| H | 2.007277  | 0.958883  | 10.462605 |
| H | 3.156327  | 0.831900  | 9.117976  |
| C | 1.415408  | 4.393428  | 10.493587 |
| H | 1.148220  | 5.455245  | 10.395406 |
| H | 0.872130  | 3.993610  | 11.368478 |
| H | 2.491265  | 4.344663  | 10.722497 |
| C | -0.775681 | 5.191550  | 8.293782  |
| H | -1.070161 | 5.528379  | 7.288676  |



H -1.704406 4.941533 8.837063

H -0.316763 6.045377 8.812516

## 1A

-----  
CARTESIAN COORDINATES (ANGSTROEM)  
-----

|    |           |          |          |
|----|-----------|----------|----------|
| Sc | 0.230634  | 6.280049 | 4.414965 |
| Sc | 1.854889  | 2.711426 | 3.675190 |
| N  | 1.008679  | 4.720981 | 3.391056 |
| N  | -1.814420 | 6.511586 | 3.682015 |
| N  | -1.449183 | 5.985971 | 5.851219 |
| N  | 4.011962  | 2.287711 | 3.257607 |
| N  | 3.311889  | 2.803199 | 5.330930 |
| C  | -2.337711 | 6.125245 | 4.855330 |
| C  | -1.905100 | 5.741612 | 7.215441 |
| H  | -2.916373 | 5.297810 | 7.188461 |
| C  | -1.998458 | 7.044411 | 8.025593 |
| H  | -2.590159 | 7.803125 | 7.494320 |
| H  | -0.997098 | 7.459469 | 8.201028 |
| H  | -2.467904 | 6.857763 | 9.005411 |
| C  | -1.005085 | 4.740707 | 7.935138 |
| H  | -1.397433 | 4.520889 | 8.940204 |
| H  | 0.009308  | 5.146560 | 8.049946 |
| H  | -0.935958 | 3.797553 | 7.375869 |
| C  | -2.599723 | 6.599904 | 2.456797 |
| H  | -3.353716 | 5.789904 | 2.433458 |
| C  | -3.350235 | 7.934646 | 2.348901 |
| H  | -4.023697 | 8.084311 | 3.204266 |
| H  | -3.953596 | 7.971734 | 1.427543 |

|   |           |           |          |
|---|-----------|-----------|----------|
| H | -2.638487 | 8.773924  | 2.329429 |
| C | -1.690141 | 6.376978  | 1.252734 |
| H | -1.211006 | 5.392578  | 1.324071 |
| H | -0.899991 | 7.141247  | 1.217319 |
| H | -2.261478 | 6.425449  | 0.312667 |
| C | 0.580990  | 8.646131  | 5.016214 |
| C | 1.001837  | 8.509094  | 3.655802 |
| C | 2.159827  | 7.679351  | 3.631434 |
| C | 2.449904  | 7.291796  | 4.970972 |
| C | 1.489557  | 7.902786  | 5.831000 |
| C | -0.585244 | 9.478931  | 5.468107 |
| H | -0.434482 | 10.543635 | 5.218035 |
| H | -0.732786 | 9.410127  | 6.554084 |
| H | -1.523825 | 9.158823  | 4.985990 |
| C | 0.409568  | 9.254258  | 2.495063 |
| H | -0.687868 | 9.284373  | 2.550148 |
| H | 0.686989  | 8.801920  | 1.531480 |
| H | 0.765505  | 10.300023 | 2.478835 |
| C | 3.068696  | 7.391818  | 2.473048 |
| H | 3.989154  | 7.998159  | 2.552790 |
| H | 2.602761  | 7.634712  | 1.508114 |
| H | 3.373339  | 6.334604  | 2.450518 |
| C | 3.658113  | 6.494484  | 5.373936 |
| H | 3.696863  | 6.341710  | 6.461402 |
| H | 4.586119  | 7.014940  | 5.078934 |
| H | 3.670525  | 5.502977  | 4.893572 |

|   |          |          |          |
|---|----------|----------|----------|
| C | 1.538645 | 7.865566 | 7.333437 |
| H | 2.514713 | 8.230557 | 7.694798 |
| H | 1.398815 | 6.855066 | 7.749049 |
| H | 0.766978 | 8.513225 | 7.770609 |
| C | 4.351734 | 2.651329 | 4.493195 |
| C | 5.787078 | 2.904879 | 4.920826 |
| H | 5.787346 | 3.456589 | 5.871279 |
| H | 6.262999 | 3.566587 | 4.179925 |
| C | 6.617422 | 1.619464 | 5.087655 |
| H | 6.035305 | 0.891990 | 5.676578 |
| H | 6.778733 | 1.152754 | 4.102671 |
| C | 7.971875 | 1.853048 | 5.767828 |
| H | 7.802419 | 2.273717 | 6.775639 |
| H | 8.457408 | 0.874408 | 5.923596 |
| C | 8.917987 | 2.765455 | 4.984838 |
| H | 9.100523 | 2.370060 | 3.971484 |
| H | 9.892317 | 2.854973 | 5.490181 |
| H | 8.508668 | 3.782713 | 4.876801 |
| C | 4.983366 | 2.159970 | 2.184050 |
| H | 5.962283 | 2.557989 | 2.508259 |
| C | 4.545566 | 2.988382 | 0.973397 |
| H | 3.564613 | 2.645694 | 0.608170 |
| H | 5.272920 | 2.898031 | 0.150624 |
| H | 4.452628 | 4.049296 | 1.248271 |
| C | 5.195566 | 0.689322 | 1.799407 |
| H | 5.491926 | 0.094306 | 2.676036 |

|   |           |           |          |
|---|-----------|-----------|----------|
| H | 5.980869  | 0.595354  | 1.031572 |
| H | 4.267965  | 0.260195  | 1.397789 |
| C | 3.460249  | 3.228534  | 6.711803 |
| H | 4.232415  | 4.017840  | 6.794228 |
| C | 2.140744  | 3.843162  | 7.163711 |
| H | 2.214941  | 4.254444  | 8.181965 |
| H | 1.345342  | 3.087177  | 7.151792 |
| H | 1.846422  | 4.654046  | 6.478827 |
| C | 3.879393  | 2.081252  | 7.643921 |
| H | 3.137687  | 1.268632  | 7.611977 |
| H | 3.963276  | 2.432970  | 8.685314 |
| H | 4.851711  | 1.660815  | 7.348091 |
| C | 0.968734  | 0.677360  | 2.543755 |
| C | -0.101968 | 1.615556  | 2.596889 |
| C | -0.446425 | 1.822902  | 3.964457 |
| C | 0.414887  | 1.008722  | 4.759163 |
| C | 1.302689  | 0.312427  | 3.882214 |
| C | 1.555911  | 0.122976  | 1.276681 |
| H | 1.967709  | 0.907807  | 0.620961 |
| H | 0.787331  | -0.413700 | 0.694382 |
| H | 2.362477  | -0.591091 | 1.489869 |
| C | -0.822835 | 2.204888  | 1.421762 |
| H | -1.722338 | 1.615165  | 1.167588 |
| H | -0.187586 | 2.233937  | 0.524326 |
| H | -1.156978 | 3.231687  | 1.634063 |
| C | -1.583259 | 2.681979  | 4.437100 |

|   |           |           |          |
|---|-----------|-----------|----------|
| H | -1.669973 | 3.589681  | 3.821113 |
| H | -1.446677 | 3.007563  | 5.477168 |
| H | -2.546328 | 2.142583  | 4.382110 |
| C | 0.323659  | 0.786114  | 6.240419 |
| H | 1.318126  | 0.730122  | 6.706499 |
| H | -0.196325 | -0.162993 | 6.462597 |
| H | -0.240053 | 1.587359  | 6.740318 |
| C | 2.370218  | -0.648415 | 4.322601 |
| H | 1.935621  | -1.591600 | 4.698859 |
| H | 2.982034  | -0.219599 | 5.132368 |
| H | 3.051381  | -0.897768 | 3.497491 |
| C | -4.672770 | 6.877647  | 5.694727 |
| H | -4.446904 | 7.863687  | 5.253870 |
| H | -4.394700 | 6.948640  | 6.756062 |
| C | -6.757501 | 6.720676  | 4.183390 |
| H | -6.596315 | 7.731430  | 3.773939 |
| H | -6.296095 | 6.003208  | 3.486099 |
| H | -7.841457 | 6.527216  | 4.182497 |
| C | -3.814397 | 5.796228  | 5.013491 |
| H | -3.902962 | 4.856202  | 5.581933 |
| H | -4.222942 | 5.587958  | 4.016842 |
| C | -6.179568 | 6.601574  | 5.595312 |
| H | -6.706573 | 7.307825  | 6.259252 |
| H | -6.387288 | 5.593520  | 5.997223 |
| N | 1.612673  | 4.248293  | 2.315799 |
| C | 1.456894  | 4.889110  | 1.029016 |

H 0.655559 4.401669 0.446024

H 1.201118 5.951952 1.140952

H 2.390300 4.794805 0.455472

Fuzzy atom bond order of complex 1.

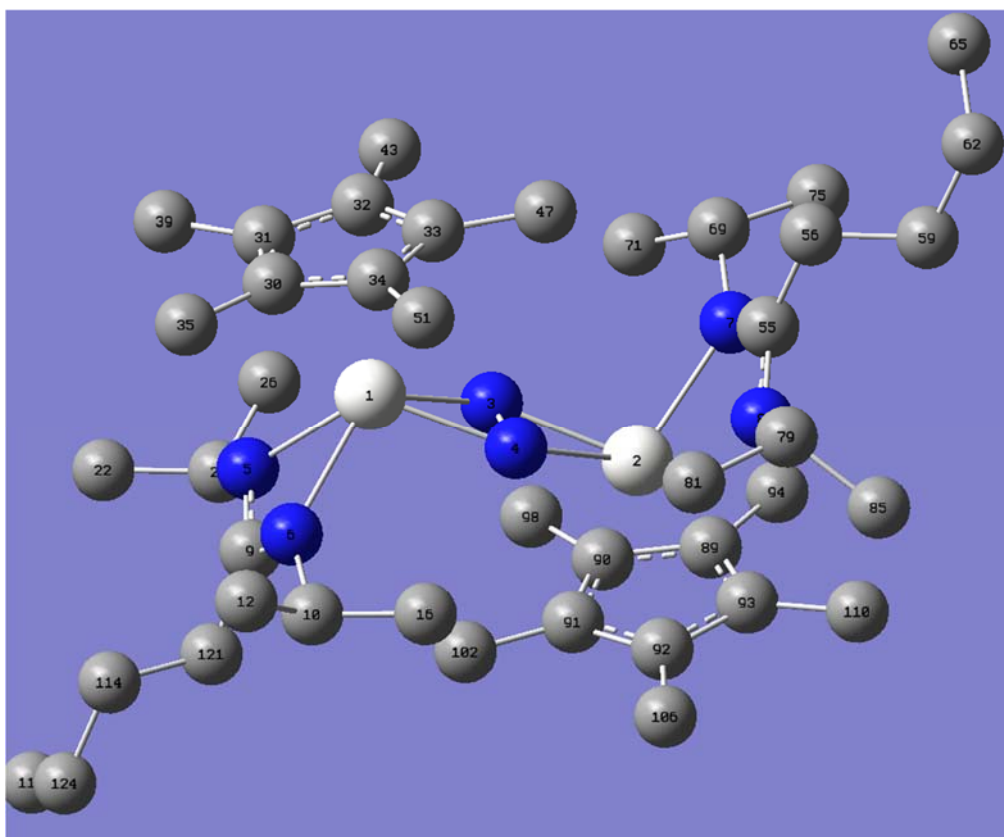

The total bond order  $\geq 0.050000$

|       |       |       |                 |                |                 |
|-------|-------|-------|-----------------|----------------|-----------------|
| # 1:  | 1(Sc) | 2(Sc) | Alpha: 0.142861 | Beta: 0.146961 | Total: 0.289822 |
| # 2:  | 1(Sc) | 3(N)  | Alpha: 0.561225 | Beta: 0.521169 | Total: 1.082394 |
| # 3:  | 1(Sc) | 4(N)  | Alpha: 0.588007 | Beta: 0.537251 | Total: 1.125259 |
| # 4:  | 1(Sc) | 5(N)  | Alpha: 0.444609 | Beta: 0.448145 | Total: 0.892754 |
| # 5:  | 1(Sc) | 6(N)  | Alpha: 0.429911 | Beta: 0.433866 | Total: 0.863778 |
| # 6:  | 1(Sc) | 9(C)  | Alpha: 0.120184 | Beta: 0.120569 | Total: 0.240753 |
| # 7:  | 1(Sc) | 10(C) | Alpha: 0.025005 | Beta: 0.025244 | Total: 0.050249 |
| # 8:  | 1(Sc) | 20(C) | Alpha: 0.025817 | Beta: 0.025911 | Total: 0.051728 |
| # 9:  | 1(Sc) | 30(C) | Alpha: 0.260122 | Beta: 0.260760 | Total: 0.520882 |
| # 10: | 1(Sc) | 31(C) | Alpha: 0.259774 | Beta: 0.261172 | Total: 0.520945 |
| # 11: | 1(Sc) | 32(C) | Alpha: 0.261240 | Beta: 0.263759 | Total: 0.524999 |
| # 12: | 1(Sc) | 33(C) | Alpha: 0.257668 | Beta: 0.257648 | Total: 0.515317 |
| # 13: | 1(Sc) | 34(C) | Alpha: 0.263247 | Beta: 0.266143 | Total: 0.529390 |
| # 14: | 1(Sc) | 35(C) | Alpha: 0.025488 | Beta: 0.025534 | Total: 0.051022 |
| # 15: | 1(Sc) | 51(C) | Alpha: 0.028503 | Beta: 0.028667 | Total: 0.057169 |
| # 16: | 2(Sc) | 3(N)  | Alpha: 0.564071 | Beta: 0.522607 | Total: 1.086678 |
| # 17: | 2(Sc) | 4(N)  | Alpha: 0.591974 | Beta: 0.535237 | Total: 1.127211 |
| # 18: | 2(Sc) | 7(N)  | Alpha: 0.447292 | Beta: 0.450413 | Total: 0.897705 |
| # 19: | 2(Sc) | 8(N)  | Alpha: 0.409842 | Beta: 0.413862 | Total: 0.823704 |



# 20: 2(Sc) 55(C) Alpha: 0.116721 Beta: 0.117121 Total: 0.233843  
# 21: 2(Sc) 69(C) Alpha: 0.025967 Beta: 0.026045 Total: 0.052011  
# 22: 2(Sc) 89(C) Alpha: 0.258101 Beta: 0.259266 Total: 0.517368  
# 23: 2(Sc) 90(C) Alpha: 0.258639 Beta: 0.261304 Total: 0.519944  
# 24: 2(Sc) 91(C) Alpha: 0.256187 Beta: 0.256094 Total: 0.512282  
# 25: 2(Sc) 92(C) Alpha: 0.262870 Beta: 0.265420 Total: 0.528290  
# 26: 2(Sc) 93(C) Alpha: 0.258290 Beta: 0.258859 Total: 0.517149  
# 27: 2(Sc) 106(C) Alpha: 0.027478 Beta: 0.027646 Total: 0.055124  
# 28: 2(Sc) 110(C) Alpha: 0.025471 Beta: 0.025527 Total: 0.050998  
# 29: 3(N) 4(N) Alpha: 0.495466 Beta: 0.674841 Total: 1.170307  
# 30: 5(N) 6(N) Alpha: 0.083732 Beta: 0.082798 Total: 0.166531  
# 31: 5(N) 9(C) Alpha: 0.699141 Beta: 0.698397 Total: 1.397537  
# 32: 5(N) 20(C) Alpha: 0.547929 Beta: 0.547776 Total: 1.095705  
# 33: 5(N) 22(C) Alpha: 0.048707 Beta: 0.048588 Total: 0.097294  
# 34: 5(N) 26(C) Alpha: 0.045555 Beta: 0.045760 Total: 0.091314  
# 35: 5(N) 121(C) Alpha: 0.035883 Beta: 0.035816 Total: 0.071700  
# 36: 6(N) 9(C) Alpha: 0.713788 Beta: 0.713908 Total: 1.427696  
# 37: 6(N) 10(C) Alpha: 0.546871 Beta: 0.546414 Total: 1.093285  
# 38: 6(N) 12(C) Alpha: 0.054047 Beta: 0.053907 Total: 0.107954  
# 39: 6(N) 16(C) Alpha: 0.044442 Beta: 0.044717 Total: 0.089159  
# 40: 6(N) 121(C) Alpha: 0.036209 Beta: 0.036216 Total: 0.072425  
# 41: 7(N) 8(N) Alpha: 0.084180 Beta: 0.083378 Total: 0.167558  
# 42: 7(N) 55(C) Alpha: 0.698018 Beta: 0.697094 Total: 1.395112  
# 43: 7(N) 56(C) Alpha: 0.035813 Beta: 0.035729 Total: 0.071542  
# 44: 7(N) 69(C) Alpha: 0.547940 Beta: 0.547877 Total: 1.095817  
# 45: 7(N) 71(C) Alpha: 0.045300 Beta: 0.045557 Total: 0.090857  
# 46: 7(N) 75(C) Alpha: 0.049411 Beta: 0.049328 Total: 0.098739  
# 47: 8(N) 55(C) Alpha: 0.719927 Beta: 0.720261 Total: 1.440187  
# 48: 8(N) 56(C) Alpha: 0.036541 Beta: 0.036569 Total: 0.073111  
# 49: 8(N) 79(C) Alpha: 0.548291 Beta: 0.547768 Total: 1.096059  
# 50: 8(N) 81(C) Alpha: 0.044709 Beta: 0.044942 Total: 0.089651  
# 51: 8(N) 85(C) Alpha: 0.053816 Beta: 0.053658 Total: 0.107474  
# 52: 9(C) 10(C) Alpha: 0.036443 Beta: 0.036439 Total: 0.072882  
# 53: 9(C) 20(C) Alpha: 0.035272 Beta: 0.035241 Total: 0.070514  
# 54: 9(C) 114(C) Alpha: 0.042814 Beta: 0.042800 Total: 0.085614  
# 55: 9(C) 121(C) Alpha: 0.517188 Beta: 0.517210 Total: 1.034398  
# 56: 10(C) 11(H) Alpha: 0.397896 Beta: 0.397908 Total: 0.795804  
# 57: 10(C) 12(C) Alpha: 0.544286 Beta: 0.544206 Total: 1.088492  
# 58: 10(C) 16(C) Alpha: 0.538506 Beta: 0.538293 Total: 1.076799  
# 59: 12(C) 13(H) Alpha: 0.442845 Beta: 0.442838 Total: 0.885684  
# 60: 12(C) 14(H) Alpha: 0.437477 Beta: 0.437474 Total: 0.874951  
# 61: 12(C) 15(H) Alpha: 0.454064 Beta: 0.454051 Total: 0.908115  
# 62: 12(C) 16(C) Alpha: 0.046200 Beta: 0.046095 Total: 0.092295

# 63: 16(C) 17(H) Alpha: 0.453168 Beta: 0.453033 Total: 0.906201  
 # 64: 16(C) 18(H) Alpha: 0.432078 Beta: 0.432052 Total: 0.864130  
 # 65: 16(C) 19(H) Alpha: 0.421199 Beta: 0.421641 Total: 0.842839  
 # 66: 20(C) 21(H) Alpha: 0.401698 Beta: 0.401702 Total: 0.803400  
 # 67: 20(C) 22(C) Alpha: 0.543554 Beta: 0.543526 Total: 1.087080  
 # 68: 20(C) 26(C) Alpha: 0.538967 Beta: 0.539055 Total: 1.078022  
 # 69: 22(C) 23(H) Alpha: 0.437541 Beta: 0.437542 Total: 0.875083  
 # 70: 22(C) 24(H) Alpha: 0.452648 Beta: 0.452645 Total: 0.905293  
 # 71: 22(C) 25(H) Alpha: 0.442775 Beta: 0.442774 Total: 0.885549  
 # 72: 22(C) 26(C) Alpha: 0.046678 Beta: 0.046630 Total: 0.093308  
 # 73: 26(C) 27(H) Alpha: 0.418056 Beta: 0.418155 Total: 0.836211  
 # 74: 26(C) 28(H) Alpha: 0.433648 Beta: 0.433557 Total: 0.867205  
 # 75: 26(C) 29(H) Alpha: 0.452961 Beta: 0.452924 Total: 0.905885  
 # 76: 30(C) 31(C) Alpha: 0.562342 Beta: 0.563822 Total: 1.126165  
 # 77: 30(C) 32(C) Alpha: 0.046870 Beta: 0.046572 Total: 0.093441  
 # 78: 30(C) 33(C) Alpha: 0.047440 Beta: 0.047500 Total: 0.094941  
 # 79: 30(C) 34(C) Alpha: 0.564670 Beta: 0.562549 Total: 1.127219  
 # 80: 30(C) 35(C) Alpha: 0.554832 Beta: 0.554824 Total: 1.109656  
 # 81: 30(C) 39(C) Alpha: 0.029395 Beta: 0.029489 Total: 0.058884  
 # 82: 30(C) 51(C) Alpha: 0.029306 Beta: 0.029206 Total: 0.058512  
 # 83: 31(C) 32(C) Alpha: 0.565437 Beta: 0.563472 Total: 1.128910  
 # 84: 31(C) 33(C) Alpha: 0.046976 Beta: 0.046985 Total: 0.093960  
 # 85: 31(C) 34(C) Alpha: 0.047036 Beta: 0.046356 Total: 0.093392  
 # 86: 31(C) 35(C) Alpha: 0.029279 Beta: 0.029385 Total: 0.058664  
 # 87: 31(C) 39(C) Alpha: 0.556325 Beta: 0.556060 Total: 1.112385  
 # 88: 31(C) 42(H) Alpha: 0.025022 Beta: 0.025028 Total: 0.050050  
 # 89: 31(C) 43(C) Alpha: 0.029081 Beta: 0.029039 Total: 0.058120  
 # 90: 32(C) 33(C) Alpha: 0.561877 Beta: 0.561816 Total: 1.123693  
 # 91: 32(C) 34(C) Alpha: 0.046098 Beta: 0.045724 Total: 0.091822  
 # 92: 32(C) 39(C) Alpha: 0.028996 Beta: 0.028852 Total: 0.057848  
 # 93: 32(C) 43(C) Alpha: 0.555128 Beta: 0.555011 Total: 1.110140  
 # 94: 32(C) 44(H) Alpha: 0.025131 Beta: 0.025111 Total: 0.050242  
 # 95: 32(C) 47(C) Alpha: 0.028334 Beta: 0.028383 Total: 0.056717  
 # 96: 33(C) 34(C) Alpha: 0.563870 Beta: 0.564068 Total: 1.127938  
 # 97: 33(C) 43(C) Alpha: 0.028522 Beta: 0.028547 Total: 0.057069  
 # 98: 33(C) 47(C) Alpha: 0.552830 Beta: 0.552871 Total: 1.105701  
 # 99: 33(C) 51(C) Alpha: 0.029104 Beta: 0.029144 Total: 0.058248  
 # 100: 34(C) 35(C) Alpha: 0.028661 Beta: 0.028525 Total: 0.057186  
 # 101: 34(C) 47(C) Alpha: 0.027999 Beta: 0.028092 Total: 0.056091  
 # 102: 34(C) 51(C) Alpha: 0.553309 Beta: 0.553128 Total: 1.106437  
 # 103: 35(C) 36(H) Alpha: 0.446119 Beta: 0.446109 Total: 0.892227  
 # 104: 35(C) 37(H) Alpha: 0.437433 Beta: 0.437438 Total: 0.874871  
 # 105: 35(C) 38(H) Alpha: 0.433886 Beta: 0.433847 Total: 0.867734

# 106: 39(C) 40(H) Alpha: 0.431426 Beta: 0.431334 Total: 0.862760  
 # 107: 39(C) 41(H) Alpha: 0.438091 Beta: 0.438101 Total: 0.876192  
 # 108: 39(C) 42(H) Alpha: 0.446630 Beta: 0.446501 Total: 0.893130  
 # 109: 43(C) 44(H) Alpha: 0.447115 Beta: 0.447038 Total: 0.894154  
 # 110: 43(C) 45(H) Alpha: 0.441939 Beta: 0.441885 Total: 0.883824  
 # 111: 43(C) 46(H) Alpha: 0.428168 Beta: 0.428494 Total: 0.856662  
 # 112: 47(C) 48(H) Alpha: 0.432376 Beta: 0.431830 Total: 0.864206  
 # 113: 47(C) 49(H) Alpha: 0.444066 Beta: 0.444110 Total: 0.888176  
 # 114: 47(C) 50(H) Alpha: 0.411102 Beta: 0.411493 Total: 0.822595  
 # 115: 51(C) 52(H) Alpha: 0.446930 Beta: 0.446946 Total: 0.893876  
 # 116: 51(C) 53(H) Alpha: 0.438183 Beta: 0.438274 Total: 0.876458  
 # 117: 51(C) 54(H) Alpha: 0.438867 Beta: 0.438858 Total: 0.877725  
 # 118: 55(C) 56(C) Alpha: 0.517058 Beta: 0.517076 Total: 1.034133  
 # 119: 55(C) 59(C) Alpha: 0.042315 Beta: 0.042302 Total: 0.084616  
 # 120: 55(C) 69(C) Alpha: 0.034862 Beta: 0.034821 Total: 0.069683  
 # 121: 55(C) 79(C) Alpha: 0.036488 Beta: 0.036495 Total: 0.072983  
 # 122: 56(C) 57(H) Alpha: 0.411097 Beta: 0.411114 Total: 0.822211  
 # 123: 56(C) 58(H) Alpha: 0.407012 Beta: 0.407011 Total: 0.814022  
 # 124: 56(C) 59(C) Alpha: 0.545994 Beta: 0.546004 Total: 1.091998  
 # 125: 56(C) 62(C) Alpha: 0.038833 Beta: 0.038833 Total: 0.077666  
 # 126: 59(C) 60(H) Alpha: 0.418842 Beta: 0.418834 Total: 0.837676  
 # 127: 59(C) 61(H) Alpha: 0.420470 Beta: 0.420473 Total: 0.840942  
 # 128: 59(C) 62(C) Alpha: 0.560823 Beta: 0.560826 Total: 1.121649  
 # 129: 59(C) 65(C) Alpha: 0.041412 Beta: 0.041412 Total: 0.082824  
 # 130: 62(C) 63(H) Alpha: 0.430916 Beta: 0.430916 Total: 0.861832  
 # 131: 62(C) 64(H) Alpha: 0.435338 Beta: 0.435339 Total: 0.870677  
 # 132: 62(C) 65(C) Alpha: 0.583940 Beta: 0.583939 Total: 1.167879  
 # 133: 62(C) 67(H) Alpha: 0.025071 Beta: 0.025071 Total: 0.050142  
 # 134: 65(C) 66(H) Alpha: 0.450143 Beta: 0.450143 Total: 0.900285  
 # 135: 65(C) 67(H) Alpha: 0.457400 Beta: 0.457400 Total: 0.914800  
 # 136: 65(C) 68(H) Alpha: 0.447033 Beta: 0.447033 Total: 0.894066  
 # 137: 69(C) 70(H) Alpha: 0.401295 Beta: 0.401299 Total: 0.802594  
 # 138: 69(C) 71(C) Alpha: 0.539161 Beta: 0.539203 Total: 1.078364  
 # 139: 69(C) 75(C) Alpha: 0.543129 Beta: 0.543108 Total: 1.086237  
 # 140: 71(C) 72(H) Alpha: 0.434039 Beta: 0.433934 Total: 0.867974  
 # 141: 71(C) 73(H) Alpha: 0.452636 Beta: 0.452546 Total: 0.905183  
 # 142: 71(C) 74(H) Alpha: 0.418064 Beta: 0.418363 Total: 0.836427  
 # 143: 71(C) 75(C) Alpha: 0.046745 Beta: 0.046678 Total: 0.093423  
 # 144: 75(C) 76(H) Alpha: 0.438459 Beta: 0.438459 Total: 0.876918  
 # 145: 75(C) 77(H) Alpha: 0.453153 Beta: 0.453160 Total: 0.906313  
 # 146: 75(C) 78(H) Alpha: 0.442354 Beta: 0.442355 Total: 0.884709  
 # 147: 79(C) 80(H) Alpha: 0.397592 Beta: 0.397601 Total: 0.795193  
 # 148: 79(C) 81(C) Alpha: 0.538784 Beta: 0.538634 Total: 1.077418

# 149: 79(C) 85(C) Alpha: 0.544283 Beta: 0.544193 Total: 1.088475  
# 150: 81(C) 82(H) Alpha: 0.453657 Beta: 0.453556 Total: 0.907213  
# 151: 81(C) 83(H) Alpha: 0.432929 Beta: 0.432854 Total: 0.865783  
# 152: 81(C) 84(H) Alpha: 0.420783 Beta: 0.421223 Total: 0.842007  
# 153: 81(C) 85(C) Alpha: 0.046292 Beta: 0.046189 Total: 0.092481  
# 154: 85(C) 86(H) Alpha: 0.437235 Beta: 0.437232 Total: 0.874467  
# 155: 85(C) 87(H) Alpha: 0.454267 Beta: 0.454244 Total: 0.908511  
# 156: 85(C) 88(H) Alpha: 0.443456 Beta: 0.443452 Total: 0.886908  
# 157: 89(C) 90(C) Alpha: 0.566717 Beta: 0.564570 Total: 1.131287  
# 158: 89(C) 91(C) Alpha: 0.047127 Beta: 0.047163 Total: 0.094290  
# 159: 89(C) 92(C) Alpha: 0.046939 Beta: 0.046404 Total: 0.093343  
# 160: 89(C) 93(C) Alpha: 0.563033 Beta: 0.564701 Total: 1.127734  
# 161: 89(C) 94(C) Alpha: 0.556575 Beta: 0.556338 Total: 1.112913  
# 162: 89(C) 96(H) Alpha: 0.025043 Beta: 0.025049 Total: 0.050093  
# 163: 89(C) 98(C) Alpha: 0.029204 Beta: 0.029125 Total: 0.058329  
# 164: 89(C) 110(C) Alpha: 0.029339 Beta: 0.029454 Total: 0.058793  
# 165: 90(C) 91(C) Alpha: 0.562196 Beta: 0.562253 Total: 1.124449  
# 166: 90(C) 92(C) Alpha: 0.046105 Beta: 0.045770 Total: 0.091875  
# 167: 90(C) 93(C) Alpha: 0.046982 Beta: 0.046624 Total: 0.093606  
# 168: 90(C) 94(C) Alpha: 0.029085 Beta: 0.028923 Total: 0.058008  
# 169: 90(C) 98(C) Alpha: 0.555557 Beta: 0.555389 Total: 1.110946  
# 170: 90(C) 99(H) Alpha: 0.025131 Beta: 0.025113 Total: 0.050244  
# 171: 90(C) 102(C) Alpha: 0.028226 Beta: 0.028317 Total: 0.056543  
# 172: 91(C) 92(C) Alpha: 0.564281 Beta: 0.564478 Total: 1.128760  
# 173: 91(C) 93(C) Alpha: 0.047699 Beta: 0.047770 Total: 0.095469  
# 174: 91(C) 98(C) Alpha: 0.028448 Beta: 0.028485 Total: 0.056932  
# 175: 91(C) 102(C) Alpha: 0.553168 Beta: 0.553131 Total: 1.106299  
# 176: 91(C) 106(C) Alpha: 0.029108 Beta: 0.029144 Total: 0.058252  
# 177: 92(C) 93(C) Alpha: 0.564834 Beta: 0.562790 Total: 1.127624  
# 178: 92(C) 102(C) Alpha: 0.028165 Beta: 0.028216 Total: 0.056381  
# 179: 92(C) 106(C) Alpha: 0.553867 Beta: 0.553759 Total: 1.107625  
# 180: 92(C) 110(C) Alpha: 0.028714 Beta: 0.028583 Total: 0.057298  
# 181: 93(C) 94(C) Alpha: 0.029431 Beta: 0.029540 Total: 0.058970  
# 182: 93(C) 106(C) Alpha: 0.029354 Beta: 0.029275 Total: 0.058629  
# 183: 93(C) 110(C) Alpha: 0.555404 Beta: 0.555358 Total: 1.110762  
# 184: 94(C) 95(H) Alpha: 0.438900 Beta: 0.438909 Total: 0.877809  
# 185: 94(C) 96(H) Alpha: 0.446876 Beta: 0.446758 Total: 0.893634  
# 186: 94(C) 97(H) Alpha: 0.431443 Beta: 0.431364 Total: 0.862807  
# 187: 98(C) 99(H) Alpha: 0.447365 Beta: 0.447325 Total: 0.894691  
# 188: 98(C) 100(H) Alpha: 0.442096 Beta: 0.442033 Total: 0.884129  
# 189: 98(C) 101(H) Alpha: 0.427802 Beta: 0.428184 Total: 0.855986  
# 190: 102(C) 103(H) Alpha: 0.409925 Beta: 0.410545 Total: 0.820470  
# 191: 102(C) 104(H) Alpha: 0.433165 Beta: 0.432668 Total: 0.865833

# 192: 102(C) 105(H) Alpha: 0.443693 Beta: 0.443757 Total: 0.887450  
# 193: 106(C) 107(H) Alpha: 0.439669 Beta: 0.439665 Total: 0.879334  
# 194: 106(C) 108(H) Alpha: 0.446810 Beta: 0.446831 Total: 0.893641  
# 195: 106(C) 109(H) Alpha: 0.437623 Beta: 0.437704 Total: 0.875327  
# 196: 110(C) 111(H) Alpha: 0.446134 Beta: 0.446101 Total: 0.892235  
# 197: 110(C) 112(H) Alpha: 0.437440 Beta: 0.437446 Total: 0.874886  
# 198: 110(C) 113(H) Alpha: 0.433439 Beta: 0.433378 Total: 0.866817  
# 199: 114(C) 115(H) Alpha: 0.419598 Beta: 0.419601 Total: 0.839199  
# 200: 114(C) 116(H) Alpha: 0.419338 Beta: 0.419330 Total: 0.838668  
# 201: 114(C) 117(C) Alpha: 0.041528 Beta: 0.041528 Total: 0.083056  
# 202: 114(C) 121(C) Alpha: 0.546524 Beta: 0.546536 Total: 1.093060  
# 203: 114(C) 124(C) Alpha: 0.560723 Beta: 0.560726 Total: 1.121449  
# 204: 117(C) 118(H) Alpha: 0.449672 Beta: 0.449672 Total: 0.899344  
# 205: 117(C) 119(H) Alpha: 0.446348 Beta: 0.446348 Total: 0.892697  
# 206: 117(C) 120(H) Alpha: 0.457542 Beta: 0.457542 Total: 0.915083  
# 207: 117(C) 124(C) Alpha: 0.584099 Beta: 0.584099 Total: 1.168198  
# 208: 120(H) 124(C) Alpha: 0.025049 Beta: 0.025049 Total: 0.050098  
# 209: 121(C) 122(H) Alpha: 0.412633 Beta: 0.412655 Total: 0.825288  
# 210: 121(C) 123(H) Alpha: 0.406484 Beta: 0.406482 Total: 0.812966  
# 211: 121(C) 124(C) Alpha: 0.039020 Beta: 0.039020 Total: 0.078040  
# 212: 124(C) 125(H) Alpha: 0.435142 Beta: 0.435143 Total: 0.870285  
# 213: 124(C) 126(H) Alpha: 0.430943 Beta: 0.430943 Total: 0.861885

Fuzzy atom bond order of complex **1A**.

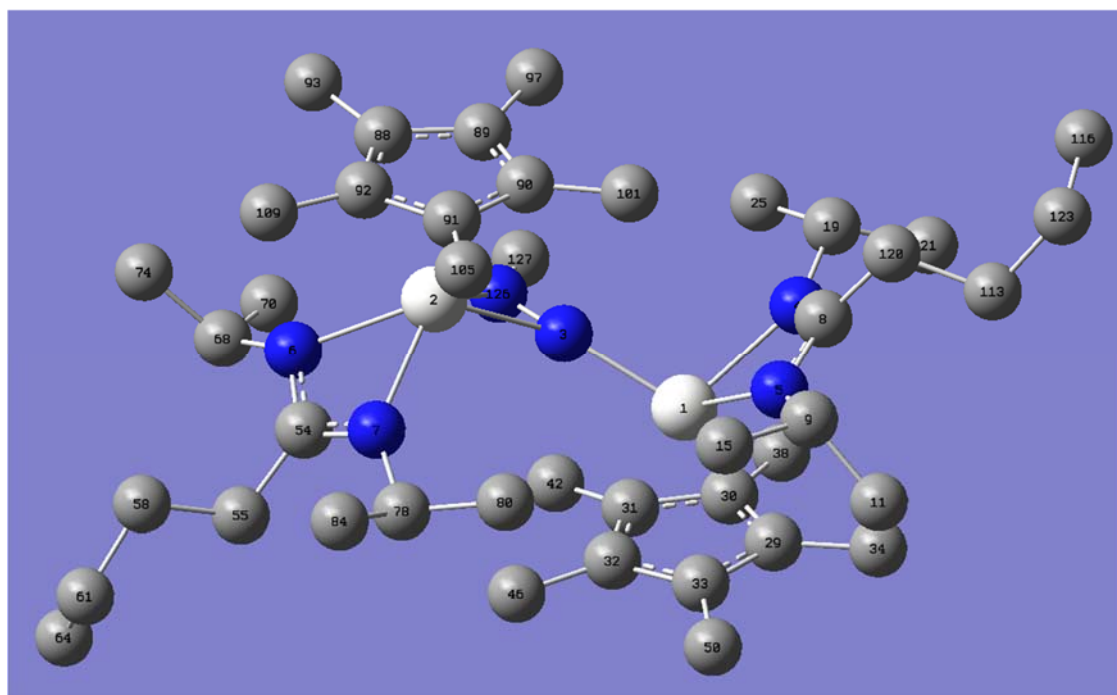

The total bond order  $\geq 0.050000$

# 1: 1(Sc) 2(Sc) Alpha: 0.077592 Beta: 0.071423 Total: 0.149015  
 # 2: 1(Sc) 3(N) Alpha: 0.768016 Beta: 0.559571 Total: 1.327587  
 # 3: 1(Sc) 4(N) Alpha: 0.479850 Beta: 0.482278 Total: 0.962128  
 # 4: 1(Sc) 5(N) Alpha: 0.454048 Beta: 0.453792 Total: 0.907839  
 # 5: 1(Sc) 8(C) Alpha: 0.116875 Beta: 0.121220 Total: 0.238095  
 # 6: 1(Sc) 9(C) Alpha: 0.025911 Beta: 0.025963 Total: 0.051874  
 # 7: 1(Sc) 19(C) Alpha: 0.027158 Beta: 0.027410 Total: 0.054568  
 # 8: 1(Sc) 29(C) Alpha: 0.279645 Beta: 0.280817 Total: 0.560462  
 # 9: 1(Sc) 30(C) Alpha: 0.284147 Beta: 0.284593 Total: 0.568740  
 # 10: 1(Sc) 31(C) Alpha: 0.268100 Beta: 0.268633 Total: 0.536732  
 # 11: 1(Sc) 32(C) Alpha: 0.270336 Beta: 0.270451 Total: 0.540787  
 # 12: 1(Sc) 33(C) Alpha: 0.276451 Beta: 0.277696 Total: 0.554147  
 # 13: 1(Sc) 34(C) Alpha: 0.027691 Beta: 0.027943 Total: 0.055634  
 # 14: 1(Sc) 50(C) Alpha: 0.025254 Beta: 0.025335 Total: 0.050589  
 # 15: 1(Sc) 126(N) Alpha: 0.080822 Beta: 0.070704 Total: 0.151526  
 # 16: 2(Sc) 3(N) Alpha: 0.441860 Beta: 0.451583 Total: 0.893443  
 # 17: 2(Sc) 6(N) Alpha: 0.440472 Beta: 0.443115 Total: 0.883587  
 # 18: 2(Sc) 7(N) Alpha: 0.461484 Beta: 0.462731 Total: 0.924215  
 # 19: 2(Sc) 54(C) Alpha: 0.115082 Beta: 0.115232 Total: 0.230314  
 # 20: 2(Sc) 68(C) Alpha: 0.025073 Beta: 0.025227 Total: 0.050300  
 # 21: 2(Sc) 78(C) Alpha: 0.026042 Beta: 0.026152 Total: 0.052193  
 # 22: 2(Sc) 88(C) Alpha: 0.278646 Beta: 0.279570 Total: 0.558217

# 23: 2(Sc) 89(C) Alpha: 0.272987 Beta: 0.273451 Total: 0.546438  
 # 24: 2(Sc) 90(C) Alpha: 0.271726 Beta: 0.272512 Total: 0.544238  
 # 25: 2(Sc) 91(C) Alpha: 0.277929 Beta: 0.278636 Total: 0.556564  
 # 26: 2(Sc) 92(C) Alpha: 0.278452 Beta: 0.278674 Total: 0.557126  
 # 27: 2(Sc) 93(C) Alpha: 0.031097 Beta: 0.031140 Total: 0.062238  
 # 28: 2(Sc) 109(C) Alpha: 0.028580 Beta: 0.028565 Total: 0.057145  
 # 29: 2(Sc) 126(N) Alpha: 0.599336 Beta: 0.538224 Total: 1.137560  
 # 30: 2(Sc) 127(C) Alpha: 0.040765 Beta: 0.038614 Total: 0.079379  
 # 31: 3(N) 126(N) Alpha: 0.593757 Beta: 0.805651 Total: 1.399408  
 # 32: 3(N) 127(C) Alpha: 0.042710 Beta: 0.051747 Total: 0.094456  
 # 33: 4(N) 5(N) Alpha: 0.080985 Beta: 0.080391 Total: 0.161376  
 # 34: 4(N) 8(C) Alpha: 0.702329 Beta: 0.698561 Total: 1.400891  
 # 35: 4(N) 19(C) Alpha: 0.538747 Beta: 0.538857 Total: 1.077604  
 # 36: 4(N) 21(C) Alpha: 0.048766 Beta: 0.048749 Total: 0.097515  
 # 37: 4(N) 25(C) Alpha: 0.046007 Beta: 0.046237 Total: 0.092244  
 # 38: 4(N) 120(C) Alpha: 0.035366 Beta: 0.035173 Total: 0.070539  
 # 39: 5(N) 8(C) Alpha: 0.705410 Beta: 0.705518 Total: 1.410929  
 # 40: 5(N) 9(C) Alpha: 0.540262 Beta: 0.540264 Total: 1.080526  
 # 41: 5(N) 11(C) Alpha: 0.049723 Beta: 0.049741 Total: 0.099464  
 # 42: 5(N) 15(C) Alpha: 0.047332 Beta: 0.047330 Total: 0.094662  
 # 43: 5(N) 120(C) Alpha: 0.035589 Beta: 0.035615 Total: 0.071204  
 # 44: 6(N) 7(N) Alpha: 0.083000 Beta: 0.082695 Total: 0.165695  
 # 45: 6(N) 54(C) Alpha: 0.720552 Beta: 0.719929 Total: 1.440481  
 # 46: 6(N) 55(C) Alpha: 0.036195 Beta: 0.036153 Total: 0.072348  
 # 47: 6(N) 68(C) Alpha: 0.541672 Beta: 0.541376 Total: 1.083049  
 # 48: 6(N) 70(C) Alpha: 0.047289 Beta: 0.047403 Total: 0.094692  
 # 49: 6(N) 74(C) Alpha: 0.051988 Beta: 0.051947 Total: 0.103935  
 # 50: 7(N) 54(C) Alpha: 0.693603 Beta: 0.693930 Total: 1.387533  
 # 51: 7(N) 55(C) Alpha: 0.034843 Beta: 0.034849 Total: 0.069692  
 # 52: 7(N) 78(C) Alpha: 0.544951 Beta: 0.544777 Total: 1.089728  
 # 53: 7(N) 80(C) Alpha: 0.047944 Beta: 0.047971 Total: 0.095915  
 # 54: 7(N) 84(C) Alpha: 0.047328 Beta: 0.047289 Total: 0.094617  
 # 55: 8(C) 9(C) Alpha: 0.036291 Beta: 0.036288 Total: 0.072579  
 # 56: 8(C) 19(C) Alpha: 0.034599 Beta: 0.034426 Total: 0.069025  
 # 57: 8(C) 113(C) Alpha: 0.041205 Beta: 0.041340 Total: 0.082544  
 # 58: 8(C) 120(C) Alpha: 0.520979 Beta: 0.520814 Total: 1.041792  
 # 59: 9(C) 10(H) Alpha: 0.393895 Beta: 0.393908 Total: 0.787803  
 # 60: 9(C) 11(C) Alpha: 0.542723 Beta: 0.542724 Total: 1.085447  
 # 61: 9(C) 15(C) Alpha: 0.545642 Beta: 0.545639 Total: 1.091281  
 # 62: 11(C) 12(H) Alpha: 0.435815 Beta: 0.435816 Total: 0.871630  
 # 63: 11(C) 13(H) Alpha: 0.432255 Beta: 0.432251 Total: 0.864506  
 # 64: 11(C) 14(H) Alpha: 0.450627 Beta: 0.450623 Total: 0.901250  
 # 65: 11(C) 15(C) Alpha: 0.046861 Beta: 0.046860 Total: 0.093721

# 66: 15(C) 16(H) Alpha: 0.449069 Beta: 0.449069 Total: 0.898138  
# 67: 15(C) 17(H) Alpha: 0.428346 Beta: 0.428345 Total: 0.856691  
# 68: 15(C) 18(H) Alpha: 0.435050 Beta: 0.435048 Total: 0.870099  
# 69: 19(C) 20(H) Alpha: 0.399070 Beta: 0.399049 Total: 0.798118  
# 70: 19(C) 21(C) Alpha: 0.544557 Beta: 0.544581 Total: 1.089139  
# 71: 19(C) 25(C) Alpha: 0.542946 Beta: 0.542857 Total: 1.085804  
# 72: 21(C) 22(H) Alpha: 0.434335 Beta: 0.434334 Total: 0.868669  
# 73: 21(C) 23(H) Alpha: 0.449365 Beta: 0.449378 Total: 0.898743  
# 74: 21(C) 24(H) Alpha: 0.437004 Beta: 0.437002 Total: 0.874005  
# 75: 21(C) 25(C) Alpha: 0.045306 Beta: 0.045285 Total: 0.090591  
# 76: 25(C) 26(H) Alpha: 0.427603 Beta: 0.427581 Total: 0.855184  
# 77: 25(C) 27(H) Alpha: 0.429016 Beta: 0.428984 Total: 0.858000  
# 78: 25(C) 28(H) Alpha: 0.448873 Beta: 0.448830 Total: 0.897703  
# 79: 29(C) 30(C) Alpha: 0.548338 Beta: 0.548900 Total: 1.097238  
# 80: 29(C) 31(C) Alpha: 0.045490 Beta: 0.044766 Total: 0.090257  
# 81: 29(C) 32(C) Alpha: 0.045561 Beta: 0.045031 Total: 0.090593  
# 82: 29(C) 33(C) Alpha: 0.557157 Beta: 0.556470 Total: 1.113626  
# 83: 29(C) 34(C) Alpha: 0.553181 Beta: 0.552537 Total: 1.105718  
# 84: 29(C) 38(C) Alpha: 0.028361 Beta: 0.028387 Total: 0.056748  
# 85: 29(C) 50(C) Alpha: 0.028834 Beta: 0.028769 Total: 0.057603  
# 86: 30(C) 31(C) Alpha: 0.560533 Beta: 0.559073 Total: 1.119606  
# 87: 30(C) 32(C) Alpha: 0.044530 Beta: 0.044601 Total: 0.089131  
# 88: 30(C) 33(C) Alpha: 0.044620 Beta: 0.044478 Total: 0.089098  
# 89: 30(C) 34(C) Alpha: 0.028394 Beta: 0.028409 Total: 0.056803  
# 90: 30(C) 38(C) Alpha: 0.556706 Beta: 0.556786 Total: 1.113492  
# 91: 30(C) 41(H) Alpha: 0.025441 Beta: 0.025435 Total: 0.050876  
# 92: 30(C) 42(C) Alpha: 0.028139 Beta: 0.028053 Total: 0.056191  
# 93: 31(C) 32(C) Alpha: 0.557698 Beta: 0.557595 Total: 1.115293  
# 94: 31(C) 33(C) Alpha: 0.044878 Beta: 0.044850 Total: 0.089728  
# 95: 31(C) 38(C) Alpha: 0.029298 Beta: 0.029245 Total: 0.058543  
# 96: 31(C) 42(C) Alpha: 0.557668 Beta: 0.557682 Total: 1.115350  
# 97: 31(C) 43(H) Alpha: 0.025745 Beta: 0.025735 Total: 0.051480  
# 98: 31(C) 46(C) Alpha: 0.028555 Beta: 0.028719 Total: 0.057274  
# 99: 32(C) 33(C) Alpha: 0.560228 Beta: 0.559675 Total: 1.119903  
# 100: 32(C) 42(C) Alpha: 0.029289 Beta: 0.029320 Total: 0.058609  
# 101: 32(C) 46(C) Alpha: 0.556887 Beta: 0.556789 Total: 1.113676  
# 102: 32(C) 50(C) Alpha: 0.029930 Beta: 0.029912 Total: 0.059843  
# 103: 33(C) 34(C) Alpha: 0.027940 Beta: 0.027858 Total: 0.055799  
# 104: 33(C) 46(C) Alpha: 0.027972 Beta: 0.027907 Total: 0.055879  
# 105: 33(C) 50(C) Alpha: 0.554257 Beta: 0.554330 Total: 1.108587  
# 106: 34(C) 35(H) Alpha: 0.443020 Beta: 0.442635 Total: 0.885654  
# 107: 34(C) 36(H) Alpha: 0.435770 Beta: 0.435791 Total: 0.871561  
# 108: 34(C) 37(H) Alpha: 0.429261 Beta: 0.429104 Total: 0.858364



# 109: 38(C) 39(H) Alpha: 0.430275 Beta: 0.430279 Total: 0.860554  
# 110: 38(C) 40(H) Alpha: 0.438190 Beta: 0.438195 Total: 0.876385  
# 111: 38(C) 41(H) Alpha: 0.441809 Beta: 0.441866 Total: 0.883674  
# 112: 42(C) 43(H) Alpha: 0.441767 Beta: 0.441810 Total: 0.883577  
# 113: 42(C) 44(H) Alpha: 0.437453 Beta: 0.437434 Total: 0.874887  
# 114: 42(C) 45(H) Alpha: 0.424080 Beta: 0.424005 Total: 0.848085  
# 115: 46(C) 47(H) Alpha: 0.432668 Beta: 0.432673 Total: 0.865342  
# 116: 46(C) 48(H) Alpha: 0.442459 Beta: 0.442495 Total: 0.884954  
# 117: 46(C) 49(H) Alpha: 0.419823 Beta: 0.419905 Total: 0.839728  
# 118: 50(C) 51(H) Alpha: 0.442277 Beta: 0.442330 Total: 0.884607  
# 119: 50(C) 52(H) Alpha: 0.435362 Beta: 0.435413 Total: 0.870775  
# 120: 50(C) 53(H) Alpha: 0.435229 Beta: 0.435222 Total: 0.870451  
# 121: 54(C) 55(C) Alpha: 0.520985 Beta: 0.520990 Total: 1.041975  
# 122: 54(C) 58(C) Alpha: 0.044276 Beta: 0.044267 Total: 0.088544  
# 123: 54(C) 68(C) Alpha: 0.035726 Beta: 0.035689 Total: 0.071415  
# 124: 54(C) 78(C) Alpha: 0.034355 Beta: 0.034362 Total: 0.068717  
# 125: 55(C) 56(H) Alpha: 0.408065 Beta: 0.408048 Total: 0.816113  
# 126: 55(C) 57(H) Alpha: 0.413139 Beta: 0.413156 Total: 0.826295  
# 127: 55(C) 58(C) Alpha: 0.544445 Beta: 0.544447 Total: 1.088892  
# 128: 55(C) 61(C) Alpha: 0.038797 Beta: 0.038797 Total: 0.077594  
# 129: 58(C) 59(H) Alpha: 0.420198 Beta: 0.420198 Total: 0.840396  
# 130: 58(C) 60(H) Alpha: 0.416992 Beta: 0.416991 Total: 0.833982  
# 131: 58(C) 61(C) Alpha: 0.561638 Beta: 0.561639 Total: 1.123277  
# 132: 58(C) 64(C) Alpha: 0.041922 Beta: 0.041921 Total: 0.083843  
# 133: 61(C) 62(H) Alpha: 0.430408 Beta: 0.430407 Total: 0.860815  
# 134: 61(C) 63(H) Alpha: 0.433600 Beta: 0.433600 Total: 0.867200  
# 135: 61(C) 64(C) Alpha: 0.583784 Beta: 0.583784 Total: 1.167569  
# 136: 64(C) 65(H) Alpha: 0.450908 Beta: 0.450908 Total: 0.901816  
# 137: 64(C) 66(H) Alpha: 0.455293 Beta: 0.455294 Total: 0.910587  
# 138: 64(C) 67(H) Alpha: 0.447275 Beta: 0.447275 Total: 0.894550  
# 139: 68(C) 69(H) Alpha: 0.395379 Beta: 0.395377 Total: 0.790756  
# 140: 68(C) 70(C) Alpha: 0.540410 Beta: 0.540443 Total: 1.080852  
# 141: 68(C) 74(C) Alpha: 0.544473 Beta: 0.544447 Total: 1.088920  
# 142: 70(C) 71(H) Alpha: 0.432002 Beta: 0.432044 Total: 0.864045  
# 143: 70(C) 72(H) Alpha: 0.450045 Beta: 0.450011 Total: 0.900056  
# 144: 70(C) 73(H) Alpha: 0.437363 Beta: 0.437201 Total: 0.874563  
# 145: 70(C) 74(C) Alpha: 0.045615 Beta: 0.045595 Total: 0.091210  
# 146: 74(C) 75(H) Alpha: 0.440510 Beta: 0.440508 Total: 0.881018  
# 147: 74(C) 76(H) Alpha: 0.451767 Beta: 0.451755 Total: 0.903522  
# 148: 74(C) 77(H) Alpha: 0.432741 Beta: 0.432741 Total: 0.865483  
# 149: 78(C) 79(H) Alpha: 0.397262 Beta: 0.397271 Total: 0.794533  
# 150: 78(C) 80(C) Alpha: 0.538944 Beta: 0.538957 Total: 1.077901  
# 151: 78(C) 84(C) Alpha: 0.542705 Beta: 0.542662 Total: 1.085367

# 152: 80(C) 81(H) Alpha: 0.443671 Beta: 0.443675 Total: 0.887346  
 # 153: 80(C) 82(H) Alpha: 0.424637 Beta: 0.424621 Total: 0.849258  
 # 154: 80(C) 83(H) Alpha: 0.424275 Beta: 0.424288 Total: 0.848563  
 # 155: 80(C) 84(C) Alpha: 0.044481 Beta: 0.044469 Total: 0.088950  
 # 156: 84(C) 85(H) Alpha: 0.437834 Beta: 0.437838 Total: 0.875672  
 # 157: 84(C) 86(H) Alpha: 0.449973 Beta: 0.449961 Total: 0.899934  
 # 158: 84(C) 87(H) Alpha: 0.436870 Beta: 0.436870 Total: 0.873740  
 # 159: 88(C) 89(C) Alpha: 0.557380 Beta: 0.557513 Total: 1.114892  
 # 160: 88(C) 90(C) Alpha: 0.044750 Beta: 0.044624 Total: 0.089374  
 # 161: 88(C) 91(C) Alpha: 0.045496 Beta: 0.044801 Total: 0.090297  
 # 162: 88(C) 92(C) Alpha: 0.557331 Beta: 0.556605 Total: 1.113936  
 # 163: 88(C) 93(C) Alpha: 0.553327 Beta: 0.553059 Total: 1.106386  
 # 164: 88(C) 97(C) Alpha: 0.027899 Beta: 0.028018 Total: 0.055917  
 # 165: 88(C) 109(C) Alpha: 0.028198 Beta: 0.028163 Total: 0.056361  
 # 166: 89(C) 90(C) Alpha: 0.557826 Beta: 0.557337 Total: 1.115162  
 # 167: 89(C) 91(C) Alpha: 0.045272 Beta: 0.045245 Total: 0.090517  
 # 168: 89(C) 92(C) Alpha: 0.044785 Beta: 0.044836 Total: 0.089620  
 # 169: 89(C) 93(C) Alpha: 0.029349 Beta: 0.029368 Total: 0.058717  
 # 170: 89(C) 97(C) Alpha: 0.555180 Beta: 0.555070 Total: 1.110251  
 # 171: 89(C) 98(H) Alpha: 0.025278 Beta: 0.025275 Total: 0.050553  
 # 172: 89(C) 101(C) Alpha: 0.028567 Beta: 0.028533 Total: 0.057100  
 # 173: 90(C) 91(C) Alpha: 0.560356 Beta: 0.560012 Total: 1.120368  
 # 174: 90(C) 92(C) Alpha: 0.045091 Beta: 0.045078 Total: 0.090169  
 # 175: 90(C) 97(C) Alpha: 0.027987 Beta: 0.027921 Total: 0.055909  
 # 176: 90(C) 101(C) Alpha: 0.556950 Beta: 0.557039 Total: 1.113988  
 # 177: 90(C) 105(C) Alpha: 0.029093 Beta: 0.029068 Total: 0.058161  
 # 178: 91(C) 92(C) Alpha: 0.552477 Beta: 0.552421 Total: 1.104898  
 # 179: 91(C) 101(C) Alpha: 0.027963 Beta: 0.028101 Total: 0.056064  
 # 180: 91(C) 105(C) Alpha: 0.558107 Beta: 0.557856 Total: 1.115964  
 # 181: 91(C) 107(H) Alpha: 0.025261 Beta: 0.025287 Total: 0.050548  
 # 182: 91(C) 109(C) Alpha: 0.028603 Beta: 0.028609 Total: 0.057212  
 # 183: 92(C) 93(C) Alpha: 0.028387 Beta: 0.028338 Total: 0.056725  
 # 184: 92(C) 105(C) Alpha: 0.028459 Beta: 0.028453 Total: 0.056912  
 # 185: 92(C) 109(C) Alpha: 0.551393 Beta: 0.551508 Total: 1.102901  
 # 186: 93(C) 94(H) Alpha: 0.435244 Beta: 0.435253 Total: 0.870497  
 # 187: 93(C) 95(H) Alpha: 0.442517 Beta: 0.442477 Total: 0.884994  
 # 188: 93(C) 96(H) Alpha: 0.435159 Beta: 0.435168 Total: 0.870327  
 # 189: 97(C) 98(H) Alpha: 0.443184 Beta: 0.443228 Total: 0.886412  
 # 190: 97(C) 99(H) Alpha: 0.436711 Beta: 0.436736 Total: 0.873447  
 # 191: 97(C) 100(H) Alpha: 0.428677 Beta: 0.428776 Total: 0.857453  
 # 192: 101(C) 102(H) Alpha: 0.418989 Beta: 0.418554 Total: 0.837543  
 # 193: 101(C) 103(H) Alpha: 0.427355 Beta: 0.427333 Total: 0.854689  
 # 194: 101(C) 104(H) Alpha: 0.441888 Beta: 0.441291 Total: 0.883179

# 195: 105(C) 106(H) Alpha: 0.430937 Beta: 0.430864 Total: 0.861800  
# 196: 105(C) 107(H) Alpha: 0.442473 Beta: 0.442265 Total: 0.884739  
# 197: 105(C) 108(H) Alpha: 0.437272 Beta: 0.437278 Total: 0.874550  
# 198: 109(C) 110(H) Alpha: 0.444183 Beta: 0.444248 Total: 0.888432  
# 199: 109(C) 111(H) Alpha: 0.431994 Beta: 0.432023 Total: 0.864018  
# 200: 109(C) 112(H) Alpha: 0.436142 Beta: 0.436144 Total: 0.872286  
# 201: 113(C) 114(H) Alpha: 0.418089 Beta: 0.418088 Total: 0.836177  
# 202: 113(C) 115(H) Alpha: 0.417288 Beta: 0.417285 Total: 0.834573  
# 203: 113(C) 116(C) Alpha: 0.041375 Beta: 0.041375 Total: 0.082750  
# 204: 113(C) 120(C) Alpha: 0.545280 Beta: 0.545216 Total: 1.090497  
# 205: 113(C) 123(C) Alpha: 0.559461 Beta: 0.559425 Total: 1.118885  
# 206: 116(C) 117(H) Alpha: 0.449040 Beta: 0.449040 Total: 0.898080  
# 207: 116(C) 118(H) Alpha: 0.445872 Beta: 0.445870 Total: 0.891742  
# 208: 116(C) 119(H) Alpha: 0.455441 Beta: 0.455439 Total: 0.910880  
# 209: 116(C) 123(C) Alpha: 0.584617 Beta: 0.584617 Total: 1.169234  
# 210: 120(C) 121(H) Alpha: 0.411943 Beta: 0.411827 Total: 0.823770  
# 211: 120(C) 122(H) Alpha: 0.403975 Beta: 0.403968 Total: 0.807944  
# 212: 120(C) 123(C) Alpha: 0.040165 Beta: 0.040174 Total: 0.080339  
# 213: 123(C) 124(H) Alpha: 0.433371 Beta: 0.433364 Total: 0.866736  
# 214: 123(C) 125(H) Alpha: 0.430223 Beta: 0.430219 Total: 0.860442  
# 215: 126(N) 127(C) Alpha: 0.578061 Beta: 0.554013 Total: 1.132074  
# 216: 126(N) 128(H) Alpha: 0.031619 Beta: 0.026914 Total: 0.058533  
# 217: 126(N) 130(H) Alpha: 0.028445 Beta: 0.026891 Total: 0.055335  
# 218: 127(C) 128(H) Alpha: 0.433500 Beta: 0.421729 Total: 0.855229  
# 219: 127(C) 129(H) Alpha: 0.421815 Beta: 0.421175 Total: 0.842990  
# 220: 127(C) 130(H) Alpha: 0.435098 Beta: 0.431814 Total: 0.866911

## References

1. F. Neese, *WIREs Comput. Mol. Sci.* 2012, **2**, 73.
2. F. Neese, *WIREs Comput. Mol. Sci.* 2017, **8**, 1327.
3. I. Mayer and P. Salvador, *Chem. Phys. Lett.* 2004, **383**, 368.
4. H. L. Schmider and A. D. Becke, *J. Molec. Struct. (THEOCHEM)*, 2000, **527**, 51.
5. T. Lu and F. Chen, *J. Comput. Chem.* 2012, **33**, 580.
